# Supplementary material
Source: PubMed Central journal article supplement (PMC4371954)
Supplement: pnas.201420536SI.pdf [file pnas.201420536SI.pdf]

# Supporting Information

Whitney et al. 10.1073/pnas.1420536112

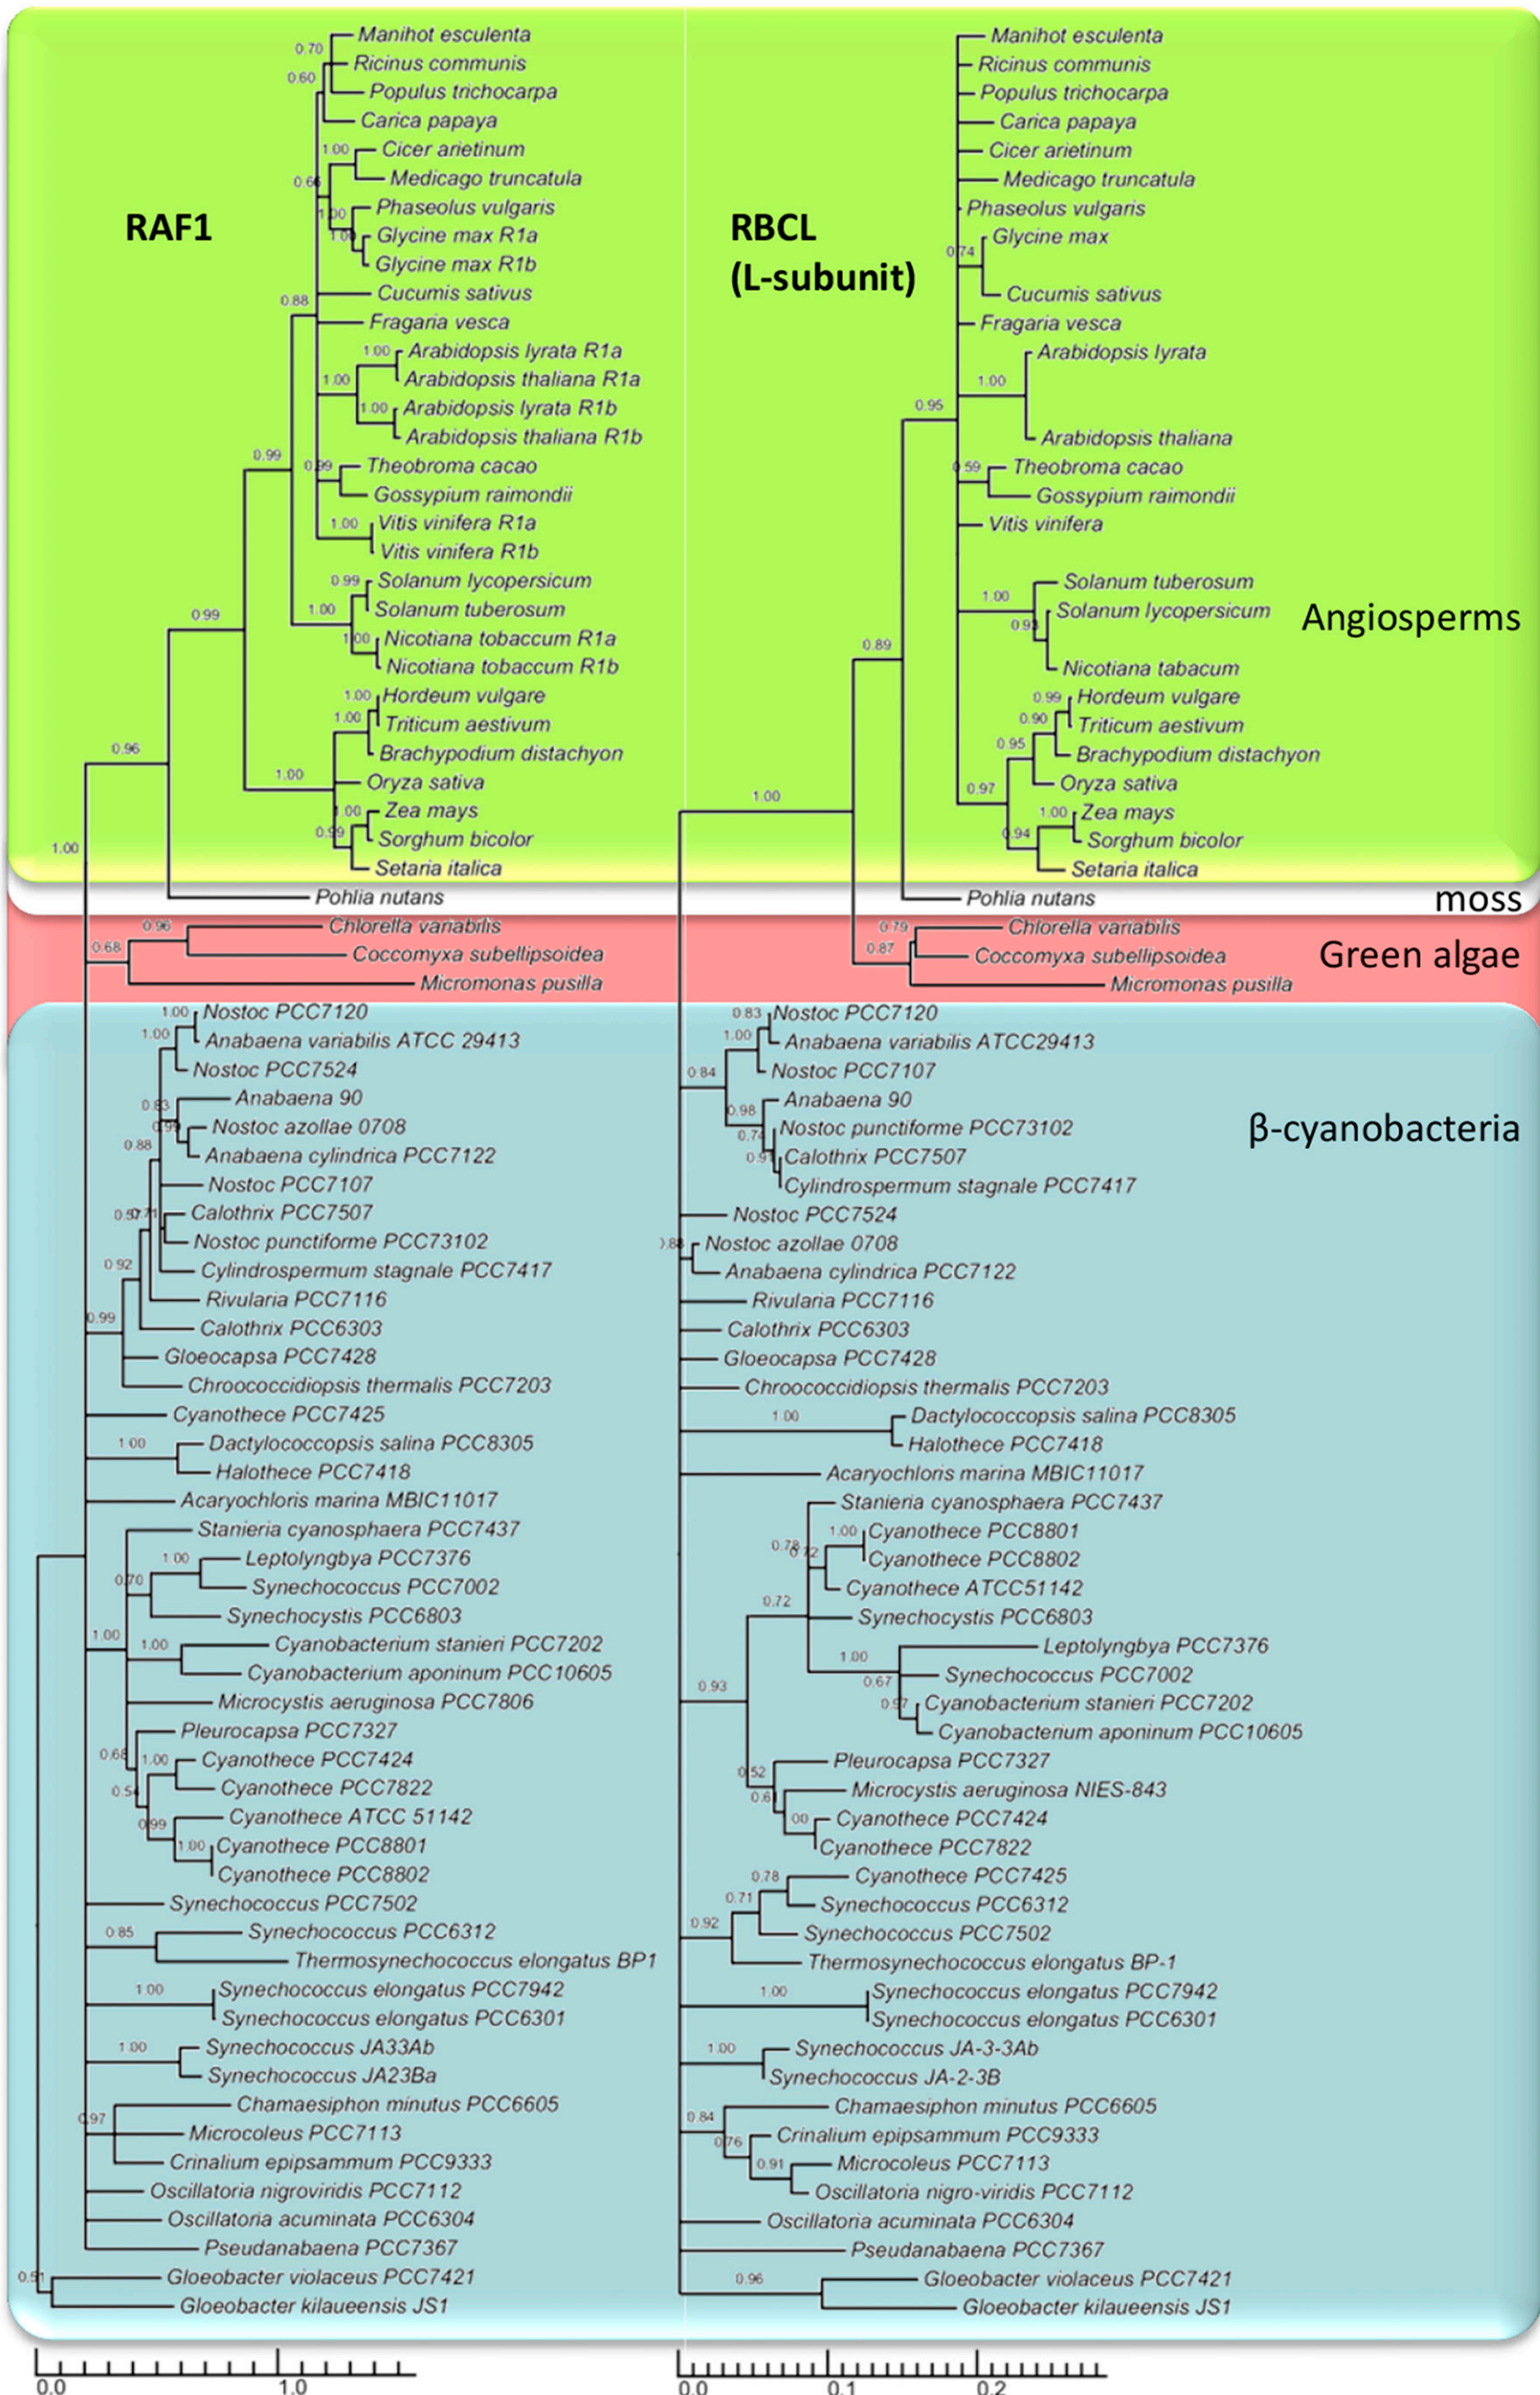

**Fig. S1.** RAF1 and Rubisco L-subunits phylogenies of plants, green algae, and  $\beta$ -cyanobacteria. (A) Maximum-likelihood trees assembled under the Dayhoff model implemented in RAxML v.8 (1) using translated amino acid sequences from the full length *raf1* and *rbcl* genes listed in Table S2. Posterior probability (PP) values are shown above tree branches; all clades with PP < 0.5 have been dissolved.

1. Stamatakis A (2014) RAxML version 8: A tool for phylogenetic analysis and post-analysis of large phylogenies. *Bioinformatics* 30(9):1312–1313.



### A SDS PAGE analysis of *Arabidopsis* RAF1 and CPN60 $\alpha$ purification

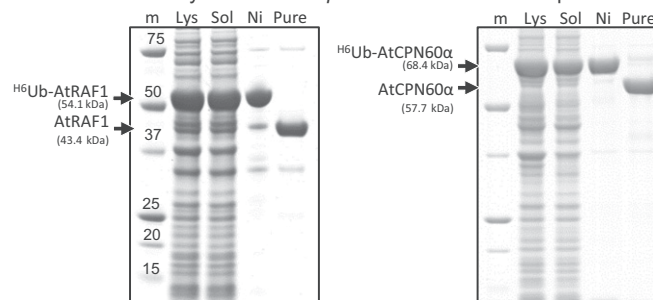

### B SDS PAGE immuno-blot quantification of leaf AtRAF1 expression

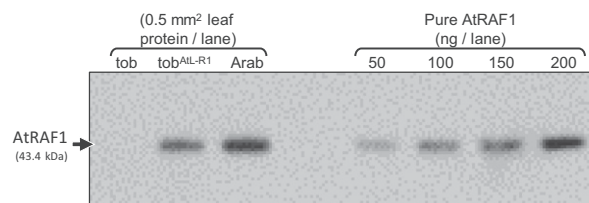

**Fig. S3.** CPN60 $\alpha$  and <sup>A</sup>RAF1 purification and quantification by immunoblot analysis. The mature coding sequence CPN60 $\alpha$ 1 (GenBank NP\_197383.1, At5g18820) from *Arabidopsis* (i.e., spanning amino acids 36–578 to exclude part or all of the chloroplast targeting sequence) was amplified by RT-PCR (SuperScript III Reverse Transcriptase, Life Technologies) using leaf RNA extracted using TRIzol Reagent (Life Technologies) and primers 5'SacIIAtCPN60 $\alpha$  (5'-CCGCGGTGGAATGGGAGCTAAGAGAATACTATAC-3') and 3'HindIII AtCPN60 $\alpha$  (5'-AAGCTTATGATGTGGGTATGCCAGG-3'). The amplified 1637-bp SacII-HindIII product was cloned in frame with the N-terminal 6x-histidine ( $H_6$ )-Ub fusion peptide in plasmid pHue (1) to give plasmid pHueCPN60 $\alpha$ . Similarly, the synthetic <sup>A</sup>raf1 gene in pLEVAtL-RAF1 (Fig. 2A) was amplified with primers 5'SacIIAtRAF1 (5'-CCGCGGTGGAATGGCTCCTTAAATCTTTGATT-3') and 3'HindIIIAtRAF1 (5'-AAGCTTCTCGAGATCCCAATTTTGATG-3') and the 1,364-bp SacII-HindIII fragment cloned into pHue to give pHueAtRAF1. *Escherichia coli* BL21 (DE3) cells transformed with plasmids pHueAtRAF1 and pHueCPN60 $\alpha$  were grown at 28 °C on a rotary shaker (150 rpm) in 0.5 L of Luria-Bertani medium containing 200  $\mu$ g/mL ampicillin. At an  $A_{600}$  of 1.0 isopropyl- $\beta$ -D-thiogalactopyranoside was added to 0.5 mM. After 6 h, the cells were harvested by centrifugation ( $3,300 \times g$ , 10 min, 4 °C) and resuspended in 10 mL of ice-cold extraction buffer (0.1 M Tris-HCl, pH 8.0, 0.3 M NaCl, 1 mM PMSF, 5 mM mercaptoethanol) and lysed by passage through a prechilled French pressure cell at 140 MPa. The extract was centrifuged ( $33,000 \times g$ , 10 min, 4 °C) and the ( $H_6$ )-Ub-RAF1 and ( $H_6$ )-UbCPN60 $\alpha$  proteins purified by Ni<sup>2+</sup>-nitrilotriacetic acid (Ni-NTA) agarose (Qiagen) chromatography, eluted in imidazole buffer (extraction buffer with 0.2M imidazole) and the ( $H_6$ )-Ub sequences removed with a ( $H_6$ )-Ub-protease as described (1) before dialyzing into storage buffer [40 mM EPPS-NaOH, pH8, 8 mM MgCl<sub>2</sub>, 0.8 mM EDTA, 20% (vol/vol) glycerol] and storing at -80 °C. (A) Protein samples during the purification were diluted with 0.25-volumes 4 $\times$  SDS reducing buffer and analyzed by SDS PAGE as described previously (2). (B) The <sup>A</sup>RAF1 content in soluble protein from known leaf areas were calculated by immuno-blot densitometry analysis against known amounts of purified <sup>A</sup>RAF1 (quantified against BSA standards) separated in parallel by SDS PAGE.

1. Baker RT, et al. (2005) Using deubiquitylating enzymes as research tools. *Methods Enzymol* 398:540–554.

2. Whitney SM, Sharwood RE (2007) Linked Rubisco subunits can assemble into functional oligomers without impeding catalytic performance. *J Biol Chem* 282(6):3809–3818.

PAGE analysis of leaf soluble and NiNTA purified protein

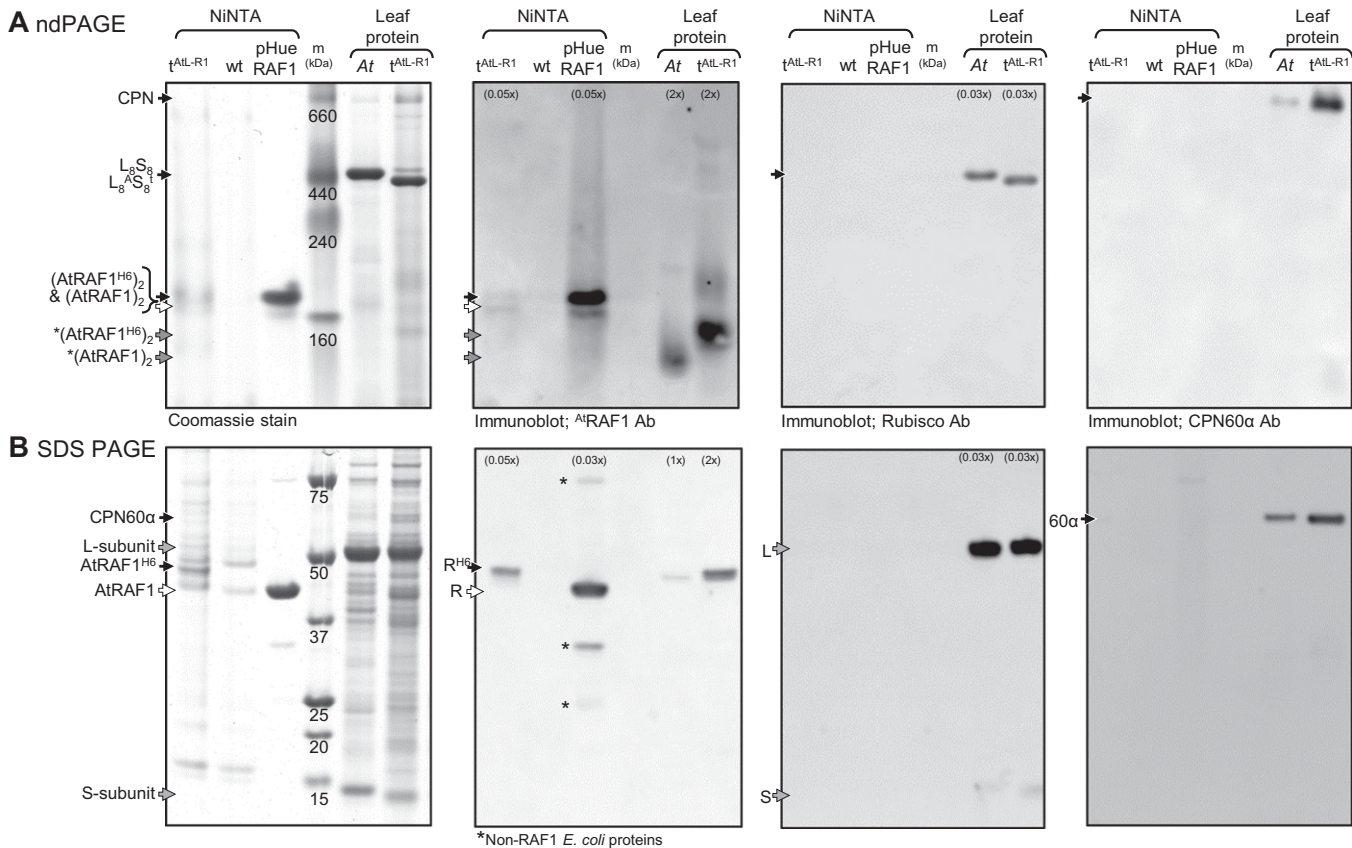

**Fig. 54.** PAGE analysis of NiNTA purified and total soluble leaf protein from *Arabidopsis* and the different tobacco genotypes. (A) ndPAGE and (B) SDS PAGE analysis of soluble leaf protein [from *Arabidopsis* (At), *tob*<sup>AtL-R1</sup> and *tob*<sup>AtL</sup>] and Ni<sup>2+</sup>-nitrilotriacetic acid agarose (Ni-NTA) purified protein from *E. coli*-pHueAtRAF1 cells (Fig. S3), tobacco (wild-type) and *tob*<sup>AtL-R1</sup> leaves. Variations in the amount of sample loaded per lane relative to the Coomassie-stained gel are shown in parentheses. For NiNTA purification ~2 g of *tob*<sup>AtL-R1</sup> and wild-type tobacco leaves were homogenized in 20 mL extraction buffer [0.1 M Tris-HCl, pH 8.0, 0.3 M NaCl, 5% (vol/vol) glycerol, 1% (wt/vol) PVPP, 1 mM PMSF, 5 mM mercaptoethanol] using 40 mL Wheaton glass homogenizers, then centrifuged (16,500 × g, 10 min, 2 °C). The soluble protein was transferred to a 10-mL Econo column (Promega) containing a 1-mL bed volume of Ni-NTA agarose (Qiagen). After the sample had passed through the resin, it was washed with 20 bed volumes of extraction buffer (no PVPP or mercaptoethanol). The bound protein was collected in 0.8 mL of elution buffer (0.1 M Tris-HCl, pH 8.0, 0.3 M NaCl, and 200 mM imidazole) and the proteins separated by PAGE, as described previously (1). Immunoblot analysis confirmed the <sup>At</sup>RAF1 purified from *tob*<sup>AtL-R1</sup> comprised two similar sized bands that matched the size of those purified from *E. coli*. In the At and *tob*<sup>AtL-R1</sup> soluble leaf protein samples the native <sup>At</sup>RAF1 and slightly larger recombinant <sup>At</sup>RAF1<sup>H6</sup> products are seen as more diffuse bands of lower apparent molecular size. No Rubisco or CPN60α subunits were detected in the NiNTA purified protein from *tob*<sup>AtL-R1</sup> or wild-type. Only the <sup>At</sup>RAF1 protein was visually unique in the Coomassie-stained NiNTA purified protein from *tob*<sup>AtL-R1</sup> suggesting it does not stably interact with any other tobacco chloroplast protein to any significant extent, although this requires closer proteomic scrutiny.

1. Whitney SM, Sharwood RE (2007) Linked Rubisco subunits can assemble into functional oligomers without impeding catalytic performance. *J Biol Chem* 282(6):3809–3818.

**A** Plant phenotype and experimental setup for analyzing Rubisco synthesis and turnover in whole leaves by  $^{35}\text{S}$ -Met pulse-chase

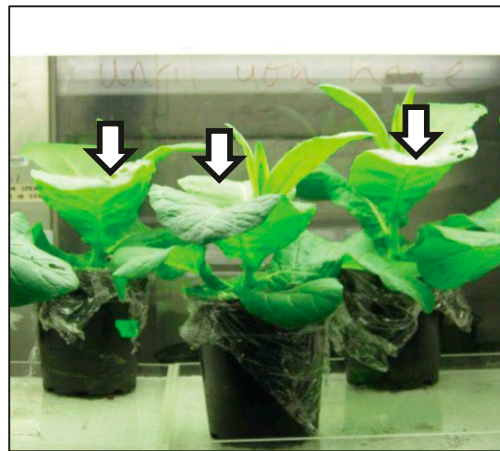

**B** Schematic of the leaf pulse-chase analysis abaxial infiltration and sampling régime

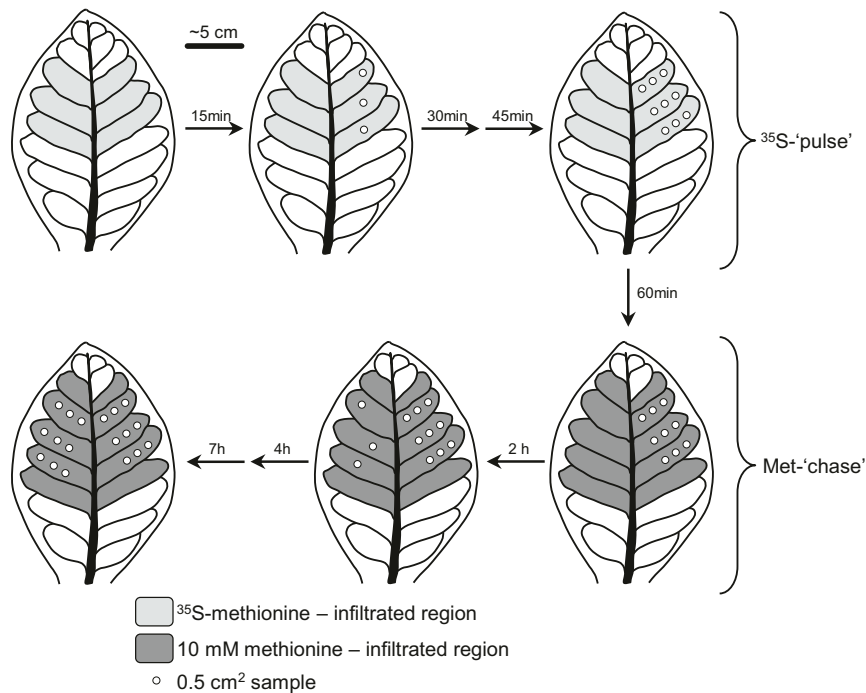

**Fig. S5.**  $^{35}\text{S}$ -labeling of Rubisco in attached tobacco leaves by a direct infiltration approach. Because of significant variations in Rubisco expression down the canopy of tobacco (1), significant care was taken to perform the  $^{35}\text{S}$ -infiltration experiments on leaves of comparable developmental status and positioning in the upper canopy. (A) The plants analyzed were all of comparable size with infiltration experiments performed on the youngest near fully expanded leaf (the fifth from the top of the canopy, indicated by white arrow) where the intercellular air spaces are optimally developed for fast and efficient liquid infiltration. (B) Showing the regions of the leaves toward the tip that were infiltrated in the experiment and the sampling protocol undertaken during both the [ $^{35}\text{S}$ ]methionine labeling ('pulse') and ensuing 10-mM methionine "chase" period.

1. Pengelly JJ, et al. (2014) Transplastomic integration of a cyanobacterial bicarbonate transporter into tobacco chloroplasts. *J Exp Bot* 65(12):3071–3080.

**Table S1. Rubisco catalysis comparison**

| Plant source                                                   | Tobacco   | <i>Arabidopsis</i> | tob <sup>Atl-R1</sup> |
|----------------------------------------------------------------|-----------|--------------------|-----------------------|
| $k_C^{cat}$ (s <sup>-1</sup> )                                 | 3.1 ± 0.1 | 3.0 ± 0.2          | 2.3 ± 0.3*            |
| $K_C$ (μM)                                                     | 9.7 ± 0.2 | 9.8 ± 0.3          | 8.6 ± 0.2*            |
| $K_O$ (μM)                                                     | 174 ± 16  | 192 ± 17           | 221 ± 16              |
| $k_C^{cat}/K_C^{21\%O_2}$ (mM <sup>-1</sup> /s <sup>-1</sup> ) | 138       | 125                | 126                   |
| $S_{CO}$ (mol/mol <sup>-1</sup> )                              | 82 ± 1    | 80 ± 2             | 80 ± 3                |

\*Significance variation ( $P < 0.05$ ) determined by  $t$ -test.  $K_C^{21\%O_2}$ , the apparent  $K_m$  for CO<sub>2</sub> ( $K_C$ ) at atmospheric [O<sub>2</sub>] (assumed 252 μM at 25 °C) calculated as  $K_C(1+[O_2]/K_O)$ .

**Table S2. List of species and accession numbers for the *raf1* and *rbcl* sequences from 26 plant, 3 algal, and 46 cyanobacteria genomes used to construct the maximum-likelihood trees in Fig. S1**

| Organism                                    | <i>raf1</i>                       | <i>rbcl</i>               | <i>matK</i>           |
|---------------------------------------------|-----------------------------------|---------------------------|-----------------------|
| <b>Angiosperms</b>                          |                                   |                           |                       |
| <i>Arabidopsis lyrata</i>                   | XM_002882316; XM_002872267        | XM_002888303              | AF144342              |
| <i>Arabidopsis thaliana</i>                 | BT015787; AY063107                | U91966ATU91966            | AF144378              |
| <i>Brachypodium distachyon</i>              | XM_003573939                      | 194033128:54293–55723     | 133917479             |
| <i>Carica papaya</i>                        | Phytozome: 162.24_CDS             | EU431223:58728–60155      | EU431223:2266–3786    |
| <i>Cicer arietinum</i>                      | XM_004495508                      | 197294093:5003–6430       | 197294093:2070–3599   |
| <i>Cucumis sativus</i>                      | XM_004142526                      | DQ865976:57578–59005      | 68164782:1838–3376    |
| <i>Fragaria vesca</i>                       | XM_004304718                      | 325126844:56459–57886     | AF288102              |
| <i>Glycine max</i>                          | XM_003536095; XR137658            | 91214122:5312–6739        | AF142700              |
| <i>Gossypium raimondii</i>                  | Phytozome:013G120100.1_CDS        | 372290914:58642–60081     | AF403559              |
| <i>Hordeum vulgare</i>                      | AK353664                          | AY137453:111–1550         | AB078139              |
| <i>Manihot esculenta</i>                    | Phytozome:03614:2579552.0.2581338 | 169794052:58063–59496     | EU117376:2063–3583    |
| <i>Medicago truncatula</i>                  | BT141443                          | JX512024:117295–118722    | AY386945              |
| <i>Nicotiana tobaccum</i>                   | current study                     | NC_001879                 | 81238323:2131–3660    |
| <i>Oryza sativa</i>                         | 115482237                         | AY522330:54082–55536      | EU434287              |
| <i>Phaseolus vulgaris</i>                   | KF033821                          | EU196765:70304–71734      | AY582987              |
| <i>Populus trichocarpa</i>                  | XM_002319615                      | 134093177:55716–57143     | 134093177:1981–3513   |
| <i>Ricinus communis</i>                     | XM_002521916                      | 372450118:58961–60388     | 372450118:2387–3907   |
| <i>Setaria italica</i>                      | XM_004982939                      | 558603649:54628–56034     | 390607728             |
| <i>Solanum lycopersicum</i>                 | XM004249865                       | 544163592:56683–58116     | 544163592:2124–3653   |
| <i>Solanum tuberosum</i>                    | 565368659                         | DQ386163.2:56531–57964    | JF772171:2140–3669    |
| <i>Sorghum bicolor</i>                      | XM_002448739                      | 118614470:57693–59123     | AF164418              |
| <i>Theobroma cacao</i>                      | Phytozome: EG026242t1_CDS         | JQ228389:59398–60852      | AY321195              |
| <i>Triticum aestivum</i>                    | AK334642                          | AY328025:60–1493          | KJ592713:1678–3216    |
| <i>Vitis vinifera</i>                       | FQ395584; FQ393164                | 91983971:59436–60863      | 91983971:2016–3524    |
| <i>Zea mays</i>                             | 226508017                         | 11994090:56874–58304      | 11994090:1674–3215    |
| <b>Bryophyta</b>                            |                                   |                           |                       |
| <i>Pohlia nutans</i>                        |                                   | AY631193                  | AY522574              |
| <b>Green Algae</b>                          |                                   |                           |                       |
| <i>Coccomyxa subellipsoidea</i>             | XM_005643171                      | HQ693844:164006–165433    | 323149147:70601–72805 |
| <i>Chlorella variabilis</i>                 | XM_005847023                      | 331268093:47431–48858     | 331268093:26130–28334 |
| <i>Micromonas pusilla</i>                   | XM_003063100                      | FJ858267:20006–21433      | FJ858269              |
| <b>β-Cyanobacteria</b>                      |                                   |                           |                       |
| <i>Acaryochloris marina MBIC11017</i>       | CP000828:1771175–1772245          | CP000828:1775408–1776838  |                       |
| <i>Anabaena cylindrica PCC 7122</i>         | CP003659:5732014–5733099          | CP003659:34579–36009      |                       |
| <i>Anabaena sp 90</i>                       | CP003284:2564028–2565113          | CP003284:1480330–1481760  |                       |
| <i>Anabaena variabilis ATCC 29413</i>       | CP000117:1756144–1757229          | CP000117:4857469–4858899  |                       |
| <i>Calothrix sp PCC 6303</i>                | CP003610:4364743–4365828          | CP003610:3605242–3606672  |                       |
| <i>Calothrix sp PCC 7507</i>                | CP003943:5400132–5401217          | CP003943:325257–326687    |                       |
| <i>Chamaesiphon minutus PCC 6605</i>        | CP003600:6052812–6053882          | CP003600:694685–696115    |                       |
| <i>Chroococcidiopsis thermalis PCC 7203</i> | CP003597:1959990–1961051          | CP003597:5964292–5965722  |                       |
| <i>Crinalium epipsammum PCC 9333</i>        | CP003620:4318634–4319728          | CP003620:4709290–4710720  |                       |
| <i>Cyanobacterium aponinum PCC 10605</i>    | CP003947:3620023–3621099          | CP003947:800936–802342    |                       |
| <i>Cyanobacterium stanieri PCC 7202</i>     | CP003940:251659–252741            | CP003940:126365–127771    |                       |
| <i>Cyanothece sp ATCC 51142</i>             | CP000806:1951795–1952787          | CP000806:3281510–3282925  |                       |
| <i>Cyanothece sp PCC 7424</i>               | CP001291:3045110–3046189          | CP001291:1503225–1504643  |                       |
| <i>Cyanothece sp PCC 7425</i>               | CP001344:4048780–4049862          | CP001344:3372918–3374348  |                       |
| <i>Cyanothece sp PCC 7822</i>               | CP002198:3872031–3873092          | CP002198:3223935–3225353  |                       |
| <i>Cyanothece sp PCC 8801</i>               | CP001287:819957–821021            | CP001287:1677472–1678890  |                       |
| <i>Cyanothece sp PCC 8802</i>               | CP001701:819755–820819            | CP001701:1666285–1667703  |                       |
| <i>Cylindrospermum stagnale PCC 7417</i>    | CP003642:6936516–6937604          | CP003642:2391125–2392555  |                       |
| <i>Dactylococcopsis salina PCC 8305</i>     | CP003944:2505154–2506221          | CP003944:1798755–1800176  |                       |
| <i>Gloeobacter kilaeensis JS1</i>           | CP003587:711901–712965            | CP003587:713821–715245    |                       |
| <i>Gloeobacter violaceus PCC 7421</i>       | 37508091:2309302–2310369          | 37508091:2307046–2308470  |                       |
| <i>Gloeocapsa sp PCC 7428</i>               | CP003646:1785908–1786993          | CP003646:1141494–1142924  |                       |
| <i>Halotheca sp PCC 7418</i>                | CP003945:2360587–2361660          | CP003945:3829408–3830826  |                       |
| <i>Leptolyngbya sp PCC 7376</i>             | CP003946:2022725–2023804          | CP003946:204758–206173    |                       |
| <i>Microcoleus sp PCC 7113</i>              | CP003630:771030–772124            | CP003630:2675003–2676433  |                       |
| <i>Microcystis aeruginosa PCC 7806</i>      | 159027328:13224–14216             | 166085114:4390428–4391843 |                       |
| <i>Nostoc azollae 708</i>                   | CP002059:4390613–4391698          | CP002059:2235547–2236977  |                       |
| <i>Nostoc punctiforme PCC 73102</i>         | CP001037:5521656–5522744          | CP001037:5263600–5265030  |                       |
| <i>Nostoc sp PCC 7107</i>                   | CP003548:2972009–2973094          | CP003548:2119530–2120960  |                       |

**Table S2. Cont.**

| Organism                                   | <i>raf1</i>              | <i>rbcl</i>              | <i>matK</i> |
|--------------------------------------------|--------------------------|--------------------------|-------------|
| <i>Nostoc sp PCC 7120</i>                  | 47118302:6264560–6265645 | 47118302:1785970–1787400 |             |
| <i>Nostoc sp PCC 7524</i>                  | CP003552:4087403–4088488 | CP003552:1290272–1291702 |             |
| <i>Oscillatoria acuminata PCC 6304</i>     | CP003607:7273598–7274692 | CP003607:1163939–1165369 |             |
| <i>Oscillatoria nigro-viridis PCC 7112</i> | CP003614:6651808–6652902 | CP003614:6951541–6952971 |             |
| <i>Pleurocapsa sp PCC 7327</i>             | CP003590:3516618–3517697 | CP003590:357448–358863   |             |
| <i>Pseudanabaena sp PCC 7367</i>           | CP003592:182052–183158   | CP003592:1184484–1185896 |             |
| <i>Rivularia sp PCC 7116</i>               | CP003549:6792297–6793388 | CP003549:4304946–4306376 |             |
| <i>Stanieria cyanosphaera PCC 7437</i>     | CP003653:1606913–1607992 | CP003653:369045–370463   |             |
| <i>Synechococcus elongatus PCC 6301</i>    | 56684969:792692–793771   | 56684969:139920–141338   |             |
| <i>Synechococcus elongatus PCC 7942</i>    | CP000100:827112–828182   | CP000100:1479461–1480879 |             |
| <i>Synechococcus sp JA-2-3Ba(2-13)</i>     | CP000240:535600–536703   | CP000240:2682338–2683762 |             |
| <i>Synechococcus sp JA-3-3Ab</i>           | CP000239:929252–930337   | CP000239:1207204–1208628 |             |
| <i>Synechococcus sp PCC 6312</i>           | CP003558:1545379–1546446 | CP003558:1977136–1978563 |             |
| <i>Synechococcus sp PCC 7002</i>           | CP000951:2467879–2468958 | CP000951:1882749–1884164 |             |

Two gene copies of *raf1* were found in five plant species (including tobacco and *Arabidopsis*; see Fig. S2B), and one copy in all other species. Accession numbers are also shown for the chloroplast *matK* sequences that were used as a negative control when testing for putative *raf1* and *rbcl* coevolution by correlating their pairwise nonsynonymous (leading to amino acid substitutions) and synonymous (selectively neutral) distances across green plants and algae (see Fig. 1B).
